# Supplementary material for: A multicenter, community-based, mixed methods assessment of the acceptability of a triple drug regimen for elimination of lymphatic filariasis
Source: PLoS Negl Trop Dis. 2021 Mar 3;15(3):e0009002. doi: 10.1371/journal.pntd.0009002 (PMC7928496; doi:10.1371/journal.pntd.0009002)
Supplement: S1 Table — (XLSX) [file pntd.0009002.s002.xlsx]

## Sheet: Demographics Table
S1 Table: Summary of sociodemographic and socioeconomic variables for all five countries
		Fiji (N = 302)		Haiti (N = 408)		India (N = 397)		Indonesia (N = 419)		Papua New Guinea (N = 393)		Total (N = 1919)
		Frequency	%	Frequency	%	Frequency	%	Frequency	%	Frequency	%	Frequency	%
Sex
	Male	185	0.612583	200	0.490196	185	0.465995	211	0.50358	224	0.569975	1005	0.52371
	Female	117	0.387417	208	0.509804	212	0.534005	208	0.49642	169	0.430025	914	0.47629
Age
	14-17	28	0.0927152	77	0.188725	51	0.128463	61	0.145585	53	0.13486	270	0.140698
	18-25	25	0.0827815	116	0.284314	111	0.279597	91	0.217184	81	0.206107	424	0.220948
	26-30	18	0.0596026	58	0.142157	60	0.151134	57	0.136038	48	0.122137	241	0.125586
	31-35	35	0.115894	35	0.0857843	35	0.0881612	45	0.107399	46	0.117048	196	0.102137
	36-40	38	0.125828	40	0.0980392	25	0.0629723	43	0.102625	33	0.0839695	179	0.0932777
	41-45	26	0.0860927	29	0.0710784	35	0.0881612	34	0.0811456	36	0.0916031	160	0.0833768
	46-50	33	0.109272	15	0.0367647	19	0.0478589	37	0.0883055	20	0.0508906	124	0.064617
	51-55	29	0.0960265	11	0.0269608	17	0.0428212	19	0.0453461	30	0.0763359	106	0.0552371
	56-60	19	0.0629139	11	0.0269608	21	0.0528967	18	0.0429594	15	0.0381679	84	0.0437728
	61+	51	0.168874	16	0.0392157	23	0.0579345	14	0.0334129	31	0.0788804	135	0.0703491
Mf status
	Mf (+)	67	0.221854	57	0.139706	28	0.070529	9	0.0214797	73	0.185751	234	0.121939
	Mf (-)	233	0.771523	351	0.860294	369	0.929471	410	0.97852	316	0.804071	1679	0.874935
	No Mf data	2	0.00662252	0	0	0	0	0	0	4	0.0101781	6	0.00312663
Education level attained*
	No school at all/some schooling	6	0.0198675	72	0.176471	174	0.438287	268	0.639618	4	0.0101781	524	0.273059
	Completed primary school	76	0.251656	119	0.291667	41	0.103275	89	0.212411	273	0.694656	598	0.311621
	Completed middle school	140	0.463576	119	0.291667	27	0.0680101	39	0.0930788	69	0.175573	394	0.205315
	Completed secondary school	51	0.168874	74	0.181373	85	0.214106	20	0.0477327	37	0.0941476	267	0.139135
	Completed university	29	0.0960265	24	0.0588235	70	0.176322	3	0.0071599	9	0.0229008	135	0.0703491
Primary source of income^
	Fishing or farming (agriculture)	151	0.5	54	0.132353	252	0.634761	393	0.937947	351	0.89313	1201	0.625847
	Daily laborer	23	0.0761589	64	0.156863	81	0.20403	9	0.0214797	4	0.0101781	181	0.09432
	Small scale enterprise	56	0.18543	191	0.468137	34	0.0856423	6	0.0143198	19	0.0483461	306	0.159458
	Private employment	2	0.00662252	54	0.132353	18	0.0453401	2	0.00477327	1	0.00254453	77	0.0401251
	Government/civil servant	36	0.119205	19	0.0465686	10	0.0251889	4	0.00954654	8	0.0203562	77	0.0401251
	Other	34	0.112583	23	0.0563725	0	0	4	0.00954654	6	0.0152672	67	0.034914
Items owned
	Radio	169	0.559603	259	0.634804	6	0.0151134	5	0.0119332	81	0.206107	520	0.270974
	Television	110	0.364238	219	0.536765	296	0.745592	3	0.0071599	30	0.0763359	658	0.342887
	Cellphone/mobile phone	234	0.774834	373	0.914216	379	0.95466	164	0.391408	228	0.580153	1378	0.718082
	Bednet	278	0.92053	261	0.639706	282	0.710327	316	0.754177	370	0.941476	1507	0.785305
	Bicycle	62	0.205298	106	0.259804	117	0.29471	6	0.0143198	74	0.188295	365	0.190203
	Generator	75	0.248344	93	0.227941	9	0.02267	8	0.0190931	38	0.0966921	223	0.116206
	Solar Panels	205	0.678808	73	0.178922	2	0.00503778	171	0.408115	212	0.53944	663	0.345492
	Electricity	169	0.559603	111	0.272059	389	0.979849	2	0.00477327	4	0.0101781	675	0.351746
Toilet type
	None	0	0	75	0.183824	307	0.7733	390	0.930788	172	0.437659	944	0.491923
	Flush toilet	292	0.966887	54	0.132353	0	0	0	0	4	0.0101781	350	0.182387
	Pit toilet/latrine	5	0.0165563	241	0.590686	11	0.0277078	11	0.026253	208	0.529262	476	0.248046
	Manual flush toilet/water seal with pour	5	0.0165563	38	0.0931373	79	0.198992	18	0.0429594	3	0.00763359	143	0.074518
	Other	0	0	0	0	0	0	0	0	6	0.0152672	6	0.00312663
Primary type of roof*
	Metal/corrugated iron	276	0.913907	252	0.617647	90	0.2267	69	0.164678	46	0.117048	733	0.38197
	Thatched	8	0.0264901	2	0.00490196	14	0.0352645	5	0.0119332	342	0.870229	371	0.19333
	Ceramic	1	0.00331126	0	0	15	0.0377834	0	0	2	0.00508906	18	0.00937989
	Concrete	6	0.0198675	149	0.365196	192	0.483627	0	0	0	0	347	0.180823
	Wood	10	0.0331126	4	0.00980392	78	0.196474	0	0	1	0.00254453	93	0.0484627
	Leaf and mud/soil	1	0.00331126	0	0	8	0.0201511	345	0.823389	1	0.00254453	355	0.184992
	Other	0	0	1	0.00245098	0	0	0	0	0	0	1	0.000521105
Primary type of floor*
	Tile	48	0.15894	42	0.102941	303	0.763224	2	0.00477327	0	0	395	0.205836
	Mud	9	0.0298013	28	0.0686275	30	0.0755668	52	0.124105	55	0.139949	174	0.0906722
	Wood	106	0.350993	4	0.00980392	2	0.00503778	21	0.0501193	280	0.712468	413	0.215216
	Concrete	137	0.453642	333	0.816176	55	0.138539	37	0.0883055	4	0.0101781	566	0.294945
	Bamboo	0	0	0	0	0	0	301	0.718377	0	0	301	0.156853
	Other	2	0.00662252	1	0.00245098	7	0.0176322	6	0.0143198	53	0.13486	69	0.0359562
	*1 missing for PNG; ^3 missing for Haiti, 2 missing for India, 1 missing for Indonesia, 4 missing for PNG
